# Supplementary material for: The Impact of Cognitive Impairment on Treatment Toxicity, Treatment Completion, and Survival among Older Adults Receiving Chemotherapy: A Systematic Review
Source: MDPI journal article supplement (doi:10.3390/cancers14061582), 2022-03-21
Supplement: s1 [file s1]

**Supplementary S3. Results from Individual Studies**

| Author/year                    | Proportion with and/or Degree of cognitive impairment                               | Endpoint outcome(s) examined | Duration of follow-up     | Baseline dose reduction (Y/N)                                                                                       | Found significant (Y/N) | Details                                                                                                                                                        | Multivariate model performed for CI (Y/N) | Adjusted for in MV |
|--------------------------------|-------------------------------------------------------------------------------------|------------------------------|---------------------------|---------------------------------------------------------------------------------------------------------------------|-------------------------|----------------------------------------------------------------------------------------------------------------------------------------------------------------|-------------------------------------------|--------------------|
| <b>Survival/Mortality</b>      |                                                                                     |                              |                           |                                                                                                                     |                         |                                                                                                                                                                |                                           |                    |
| Abe <sup>24</sup>              | 22.6%) had CI (7/31) CI<br><br>N=4 Mild (MMSE: 20-23)<br>N=3 Moderate (MMSE: 14-19) | 1-year Overall Survival      | 1 year                    | NR                                                                                                                  | N                       | 1-year OS of patients with CI was 0%. In univariate analysis model, CI <sup>a</sup> was not associated with 1-year OS (p=0.1384) (no other estimates provided) | N/A                                       | N/A                |
| Aldricks <sup>25</sup> (2011)  | 10% (21/202) had CI (MMSE <=24):                                                    | Mortality                    | Median 9 months (1-33)    | NR                                                                                                                  | N                       | Model 1: HR 0.99 (0.48-2.07)<br><br>Model 2: HR 0.92 (0.44-1.93)                                                                                               | N/A                                       | N/A                |
| Aaldriks (2013a) <sup>26</sup> | 13% (19/143) suspect for cognitive decline (IQ-CODE >3.31 pts)                      | Mortality                    | Median 15 months (0.5-62) | 16% patients received reduced dose (reason not known. It is not reported how many % of which were patients with CI) | N                       | Adjuvant group: HR 3.08 (0.76-20.93)<br><br>Palliative group: HR 1.51 (0.59-3.85)                                                                              | N/A                                       | N/A                |

| Author/year                    | Proportion with and/or Degree of cognitive impairment                                                      | Endpoint outcome(s) examined | Duration of follow-up                                                                                             | Baseline dose reduction (Y/N) | Found significant (Y/N) | Details                                                      | Multivariate model performed for CI (Y/N) | Adjusted for in MV |
|--------------------------------|------------------------------------------------------------------------------------------------------------|------------------------------|-------------------------------------------------------------------------------------------------------------------|-------------------------------|-------------------------|--------------------------------------------------------------|-------------------------------------------|--------------------|
|                                | 8% (11/143) had CI (MMSE <= 24 pts):                                                                       |                              |                                                                                                                   |                               |                         |                                                              |                                           |                    |
| Aaldriks (2013b) <sup>27</sup> | 9% (5/55) had CI (MMSE <= 24 pts):<br><br>18% (10/55) had CI (IQCODE >= 3.3)                               | Mortality                    | Median 11 months (0-57)                                                                                           | NR                            | N                       | MMSE: HR 1.68 (0.49-5.78)<br><br>IQCODE: HR 1.07 (0.49-2.37) | N/A                                       | N/A                |
| Aaldriks (2016) <sup>28</sup>  | 12.9% (62/494) suspect for cognitive decline (IQCODE >3.31 pts)<br><br>9% (44/494) had CI (MMSE <= 24 pts) | Mortality                    | Time between first geriatric assessment (window from May 2004-Feb 2010) and January 1, 2013, or the date of death | NR                            | N                       | MMSE: 1.36 (0.97-1.91)<br><br>IQCODE: 1.12 (0.83-1.50)       | N/A                                       | N/A                |

| Author/year                    | Proportion with and/or Degree of cognitive impairment                                            | Endpoint outcome(s) examined | Duration of follow-up | Baseline dose reduction (Y/N)                                                                                                           | Found significant (Y/N) | Details                                                                                                                                                          | Multivariate model performed for CI (Y/N) | Adjusted for in MV                                                                             |
|--------------------------------|--------------------------------------------------------------------------------------------------|------------------------------|-----------------------|-----------------------------------------------------------------------------------------------------------------------------------------|-------------------------|------------------------------------------------------------------------------------------------------------------------------------------------------------------|-------------------------------------------|------------------------------------------------------------------------------------------------|
|                                |                                                                                                  |                              |                       |                                                                                                                                         |                         |                                                                                                                                                                  |                                           |                                                                                                |
| Biesma <sup>30</sup> (2011)    | NR                                                                                               | Survival                     | Median 21.0 months    | NR                                                                                                                                      | N                       | HR 0.95 (0.83-1.09)                                                                                                                                              | N/A                                       | N/A                                                                                            |
| Dubruille <sup>31</sup> (2015) | 31% (28/90) had CI (MMSE <27)<br><br>51% (46/90) had CI (MoCA <26)<br><br>Patients with dementia | One-year survival            | 1 year                | Initial treatment choice: 66% received full dose, 34% received reduced dose. However, unclear how many CI patients received which dose. | Y                       | Cognitive status (HR = 3.260, 95% CI: 1.043-10.194; p = 0.042) were predictive of OS<br><br>1-year OS was 63% for patients with CI versus 88% for those without. | Y                                         | Age, gender, diagnosis, disease status, ECOG, initial treatment choice, tolerance to treatment |

| Author/year                    | Proportion with and/or Degree of cognitive impairment             | Endpoint outcome(s) examined                         | Duration of follow-up                | Baseline dose reduction (Y/N)                                                                                   | Found significant (Y/N) | Details                                                                                                  | Multivariate model performed for CI (Y/N) | Adjusted for in MV                         |
|--------------------------------|-------------------------------------------------------------------|------------------------------------------------------|--------------------------------------|-----------------------------------------------------------------------------------------------------------------|-------------------------|----------------------------------------------------------------------------------------------------------|-------------------------------------------|--------------------------------------------|
|                                | were excluded                                                     |                                                      |                                      |                                                                                                                 |                         |                                                                                                          |                                           |                                            |
| Falandry <sup>33</sup> (2013a) | 29% (32/111) had CI (MMS <25)                                     | Overall survival                                     | Median 16.4 months (0.2-49.6 months) | Patients received carbo dosed at AUC 5mg/ml/min for 30 min q3 week up to 6 cycles                               | N                       | MMSE score >24 was associated with increased survival: HR 1.08, p=0.79 (no confidence interval provided) | N/A                                       | N/A                                        |
| Falandry <sup>34</sup> (2013b) | Five words recall: mean 18.5 (SD 3.4) (no other details provided) | Progression free survival (PFS) and overall survival | 24 months                            | Did not mention<br><br>Only said 6 courses of "adapted dose of pegylated liposomo doxorubisin(40mg/m Q28 days)" | N                       | NR                                                                                                       | N/A                                       | N/A                                        |
| Hamaker <sup>35</sup>          | 7% MMSE<=23                                                       | Survival                                             | 24 months                            | NR                                                                                                              | Y<br><br>N              | Univariate model: HR 3.74 (1.43-9.73)<br>Multivariate model: HR 1.88 (confidence interval not provided)  | Y                                         | Age, performance status, chemotherapy type |

| Author/year                | Proportion with and/or Degree of cognitive impairment                                                                                                                | Endpoint outcome(s) examined | Duration of follow-up | Baseline dose reduction (Y/N)                                                                                                               | Found significant (Y/N) | Details                                                                                                                                                                                                                                                                                                                                                                                                                         | Multivariate model performed for CI (Y/N) | Adjusted for in MV                      |
|----------------------------|----------------------------------------------------------------------------------------------------------------------------------------------------------------------|------------------------------|-----------------------|---------------------------------------------------------------------------------------------------------------------------------------------|-------------------------|---------------------------------------------------------------------------------------------------------------------------------------------------------------------------------------------------------------------------------------------------------------------------------------------------------------------------------------------------------------------------------------------------------------------------------|-------------------------------------------|-----------------------------------------|
| Hshieh <sup>3</sup> (2018) | 35.3% (127/360) had probable executive dysfunction (CIB score <5);<br><br>17.2% (62/360) had probable working memory impairment (<= 2 words in 5-word delayed recall | Survival                     | 1 year                | 65.6% percent of sample underwent intensive treatment: among this group decreased survival was seen for probable impairment For both tests. | Y                       | Patients with impaired working memory had worse median survival (10.9 [SD 12.9] vs 12.2 [SD 14.7] months; log rank $p < .001$ ), including when stratified by indolent cancer (log rank $p = .01$ ) and aggressive cancer ( $p < .001$ ), and in multivariate analysis when adjusted for age, comorbidities, and disease aggressiveness (adds ratio, 0.26; 95% CI, 0.13-0.50). Impaired working memory was also associated with | Y                                         | Age, comorbidity, cancer aggressiveness |

| Author/year                 | Proportion with and/or Degree of cognitive impairment | Endpoint outcome(s) examined | Duration of follow-up | Baseline dose reduction (Y/N) | Found significant (Y/N) | Details                                                                                                                                                                                                                  | Multivariate model performed for CI (Y/N) | Adjusted for in MV                                         |
|-----------------------------|-------------------------------------------------------|------------------------------|-----------------------|-------------------------------|-------------------------|--------------------------------------------------------------------------------------------------------------------------------------------------------------------------------------------------------------------------|-------------------------------------------|------------------------------------------------------------|
|                             |                                                       |                              |                       |                               |                         | worse survival for those undergoing intensive treatment (log-rank $p < .001$ )<br>Executive dysfunction was associated with worse survival only among patients who underwent 'intensive treatment' (log-rank $p = .03$ ) |                                           |                                                            |
| Klepin <sup>36</sup> (2013) | 28.8% had CI (3MS** < 77)                             | Overall survival             | 30 days               | No mention of dose reduction  | Y                       | Impaired cognition was associated with worse overall survival<br>Unadjusted HR 2.4 (95% CI: 1.3-4.4)<br>Adjusted^^ HR 2.5 (95% CI: 1.2-5.5)                                                                              | Y                                         | Age, gender, ECOG, cytogenetic risk group, MDS, hemoglobin |

| Author/year                | Proportion with and/or Degree of cognitive impairment   | Endpoint outcome(s) examined | Duration of follow-up          | Baseline dose reduction (Y/N) | Found significant (Y/N) | Details                                                                                                                                                    | Multivariate model performed for CI (Y/N) | Adjusted for in MV |
|----------------------------|---------------------------------------------------------|------------------------------|--------------------------------|-------------------------------|-------------------------|------------------------------------------------------------------------------------------------------------------------------------------------------------|-------------------------------------------|--------------------|
|                            |                                                         |                              |                                |                               |                         | median OS for patients with CI was 5.2 months compared to 15.6 months for those without impairment                                                         |                                           |                    |
| Lee <sup>44</sup> (2020)   | 28.3% had dementia (no details on assessment tool used) | Overall survival             | Median 15.4 months (0.3-107.6) | Unclear                       | N                       | No significant difference was found between survivor group and non-survivor group in terms of cognitive status (p=0.168). Confidence interval not provided | N/A                                       | N/A                |
| Molga <sup>38</sup> (2019) | 11% had CI (MMSE < 24)                                  | Overall survival             | Varied                         | N                             | N                       | HR 1.08 (0.38-3.02)<br><br>Analysis of OS of those who could not complete 6 cycles included 8 patients – the 4                                             | N/A                                       | N/A                |

| Author/year               | Proportion with and/or Degree of cognitive impairment                                                                                            | Endpoint outcome(s) examined | Duration of follow-up | Baseline dose reduction (Y/N) | Found significant (Y/N) | Details                                                                                                                                                                                                             | Multivariate model performed for CI (Y/N) | Adjusted for in MV                                                             |
|---------------------------|--------------------------------------------------------------------------------------------------------------------------------------------------|------------------------------|-----------------------|-------------------------------|-------------------------|---------------------------------------------------------------------------------------------------------------------------------------------------------------------------------------------------------------------|-------------------------------------------|--------------------------------------------------------------------------------|
|                           |                                                                                                                                                  |                              |                       |                               |                         | with CI and 4 others without CI). The 4 patients with CI stopped due to comorbidities or intercurrent illness; whereas patients without CI stopped due to lack of response/disease progression                      |                                           |                                                                                |
| Robb <sup>39</sup> (2009) | Case control study: case: n=86<br>Control: n=172<br><br>Among the cases, a cutoff of $\leq 20$ was used to delineate mild vs. moderate-to-severe | Survival                     | N/A (case-control)    | NR                            | Y                       | Non-CI group had greater survival (Mdn = 72.6 months) than CI group (Mdn = 23.0 months); $p < .001$<br><br>Cognitive status was an independent predictor of survival ( $p = .045$ ) (other estimates not available) | Y                                         | Baseline ECOG, ADLs/IADLs, CIRS-G, Charlson scores, GDS score, age, and gender |



| Author/year                    | Proportion with and/or Degree of cognitive impairment | Endpoint outcome(s) examined                              | Duration of follow-up             | Baseline dose reduction (Y/N)                                                                                                           | Found significant (Y/N)        | Details                                                                                                                                                                   | Multivariate model performed for CI (Y/N) | Adjusted for in MV                                          |
|--------------------------------|-------------------------------------------------------|-----------------------------------------------------------|-----------------------------------|-----------------------------------------------------------------------------------------------------------------------------------------|--------------------------------|---------------------------------------------------------------------------------------------------------------------------------------------------------------------------|-------------------------------------------|-------------------------------------------------------------|
| Soubeyran <sup>41</sup> (2012) | 19% had CI (MMSE ≤ 23)                                | Mortality (early death risk [defined as within 6 months]) | 6 months                          | 14.9% received standard reduced treatment<br><br>40.2% received adapted treatment<br>Unclear how many of whom among these groups had CI | Y<br><br><br><br><br><br><br>N | Significant in univariate model (P = .012) (actual magnitude effects not provided)<br><br>Not significant in multivariate model adjusting for treatment site (details NR) | Y                                         | Treatment site                                              |
| Thibaud <sup>42</sup> (2021)   | 31% had CI (MMSE <27)                                 | Survival                                                  | 12 months                         | 65% received standard dose: 35% received reduced dose. Unclear whether or how many CI patients had reduced dose                         | Y                              | Cognitive impairment (MMSE < 27) predicted one-year survival (HR 1.82 [95% CI 1.13-2.91], p = 0.01)<br><br>(actual magnitude of effects not provided)                     | Y                                         | <i>"impact of disease itself and other vulnerabilities"</i> |
| Wildes <sup>43</sup> (2013)    | 4.8% (3/63)                                           | Mortality                                                 | Median 20 months (0.01-47 months) | n=1 received dose reduction due to renal impairment                                                                                     | N                              | HR 0.83 (0.11-6.23)                                                                                                                                                       | N/A                                       | N/A                                                         |

| Author/year                    | Proportion with and/or Degree of cognitive impairment                     | Endpoint outcome(s) examined                                                                     | Duration of follow-up | Baseline dose reduction (Y/N)                                                                                                                                        | Found significant (Y/N) | Details                                                                                                                                                                                                                                                                                              | Multivariate model performed for CI (Y/N) | Adjusted for in MV |
|--------------------------------|---------------------------------------------------------------------------|--------------------------------------------------------------------------------------------------|-----------------------|----------------------------------------------------------------------------------------------------------------------------------------------------------------------|-------------------------|------------------------------------------------------------------------------------------------------------------------------------------------------------------------------------------------------------------------------------------------------------------------------------------------------|-------------------------------------------|--------------------|
|                                | Short Blessed score >9                                                    |                                                                                                  |                       |                                                                                                                                                                      |                         |                                                                                                                                                                                                                                                                                                      |                                           |                    |
| <b>Chemotherapy completion</b> |                                                                           |                                                                                                  |                       |                                                                                                                                                                      |                         |                                                                                                                                                                                                                                                                                                      |                                           |                    |
| Abe <sup>24</sup> (2011)       | 22.6% had CI:<br><br>N=4 Mild (MMSE: 20-23)<br>N=3 Moderate (MMSE: 14-19) | Complete remission (CR)<br><br>Unplanned endpoint: discontinuation of consolidation chemotherapy | 3 year                | All 7 alzheimers pateints received (donezepezil hydrochloride, drug therapy for BPSD, and support by family during chemotherapy.<br><br>No mention of dose reduction | Unclear                 | All 7 patients with CI were able to receive chemotherapy through administration of donepezil hydrochloride, and family support during chemotherapy administration. CR was achieved in the 3 moderate cases CI. However, consolidation chemotherapy was discontinued in all 7 patients with CI due to | N/A                                       | N/A                |

| Author/year                   | Proportion with and/or Degree of cognitive impairment                                        | Endpoint outcome(s) examined         | Duration of follow-up                                                                                             | Baseline dose reduction (Y/N)                                                               | Found significant (Y/N) | Details                                                                                                                                     | Multivariate model performed for CI (Y/N) | Adjusted for in MV |
|-------------------------------|----------------------------------------------------------------------------------------------|--------------------------------------|-------------------------------------------------------------------------------------------------------------------|---------------------------------------------------------------------------------------------|-------------------------|---------------------------------------------------------------------------------------------------------------------------------------------|-------------------------------------------|--------------------|
|                               |                                                                                              |                                      |                                                                                                                   |                                                                                             |                         | exacerbation of BPSD                                                                                                                        |                                           |                    |
| Aaldriks <sup>28</sup> (2016) | 12.9% had suspect for cognitive decline (IQ-CODE >3.31 pts)<br>9% had CI (MMSE ≤ 24 pts): 9% | Chemotherapy completion (≥ 4 cycles) | Time between first geriatric assessment (window from May 2004-Feb 2010) and January 1, 2013, or the date of death | It was only reported that patients stated chemotherapy.<br><br>No mention of dose reduction | N                       | Univariable analysis:<br><br>IQCODE:<br>OR 0.96 (0.53-1.75)<br><br>MMSE:<br>OR 1.65 (0.87-3.13)                                             | N/A                                       | N/A                |
| Aldricks <sup>25</sup> (2011) | 11% had CI (MMSE ≤ 24)<br><br>15% had CI (IQCODE >3.31)                                      | Chemotherapy completion              | Unclear                                                                                                           | NR                                                                                          | Y                       | Compared to those who received ≥ 4 cycles of chemotherapy, MMSE scores were significant lower for patients who received < 4 cycles (p=0.04) | N/A                                       | N/A                |

| Author/year                  | Proportion with and/or Degree of cognitive impairment | Endpoint outcome(s) examined                  | Duration of follow-up         | Baseline dose reduction (Y/N) | Found significant (Y/N) | Details                                                                                                                                                                                                                                                              | Multivariate model performed for CI (Y/N) | Adjusted for in MV                       |
|------------------------------|-------------------------------------------------------|-----------------------------------------------|-------------------------------|-------------------------------|-------------------------|----------------------------------------------------------------------------------------------------------------------------------------------------------------------------------------------------------------------------------------------------------------------|-------------------------------------------|------------------------------------------|
|                              |                                                       |                                               |                               |                               |                         | <p>(other estimates not available)</p> <p>Among those with CI (IQCODE &gt;3.31), 20% underwent &lt;4 cycles whereas 13% underwent ≥4 cycles (p=0.2).</p> <p>Among those with CI (MMSE ≤ 24), 11% underwent &lt;4 cycles whereas 3% underwent ≥4 cycles (p=0.04).</p> |                                           |                                          |
| Laurent <sup>37</sup> (2014) | 12.3% had CI (MMSE<24)                                | Chemo discontinuation ? (Chemo feasibility??) | Median 13.4 months (5.3-24.6) | NR                            | Y                       | Higher MMSE (median 28 (27-30]) significant in univariate analysis (p = .05)                                                                                                                                                                                         | Y                                         | Functional status, mobility limitation f |

| Author/year                | Proportion with and/or Degree of cognitive impairment | Endpoint outcome(s) examined | Duration of follow-up | Baseline dose reduction (Y/N)                                                        | Found significant (Y/N) | Details                                                                                                                                                                                                                                                                                                           | Multivariate model performed for CI (Y/N) | Adjusted for in MV |
|----------------------------|-------------------------------------------------------|------------------------------|-----------------------|--------------------------------------------------------------------------------------|-------------------------|-------------------------------------------------------------------------------------------------------------------------------------------------------------------------------------------------------------------------------------------------------------------------------------------------------------------|-------------------------------------------|--------------------|
|                            |                                                       |                              |                       |                                                                                      | N                       | (actual absolute magnitude of effects not provided)<br>Not significant in multivariate model (details on estimates not provided)                                                                                                                                                                                  |                                           |                    |
| Molga <sup>38</sup> (2019) | 11% had CI (MMSE <24)                                 | Chemotherapy completion      | 50 months             | It was mentioned there was no change in planned treatment due to geriatric deficits. | Y                       | <p>Patients with CI completed significantly less azacitidine cycles compared to those without CI (<math>3.5 \pm 2.1</math> vs. <math>10.9 \pm 7.9</math>; <math>p=0.34</math>)</p> <p>A higher number of patients with CI (3/4; 75%) could not completed 6 cycles of azacitidine compared to patients without</p> | N/A                                       | N/A                |

| Author/year                   | Proportion with and/or Degree of cognitive impairment | Endpoint outcome(s) examined                         | Duration of follow-up                                                            | Baseline dose reduction (Y/N)                                                                                                                                                           | Found significant (Y/N) | Details                                                                                                                                                                                                                                                                           | Multivariate model performed for CI (Y/N) | Adjusted for in MV |
|-------------------------------|-------------------------------------------------------|------------------------------------------------------|----------------------------------------------------------------------------------|-----------------------------------------------------------------------------------------------------------------------------------------------------------------------------------------|-------------------------|-----------------------------------------------------------------------------------------------------------------------------------------------------------------------------------------------------------------------------------------------------------------------------------|-------------------------------------------|--------------------|
|                               |                                                       |                                                      |                                                                                  |                                                                                                                                                                                         |                         | CI (5/21; 24%) (p = .05).                                                                                                                                                                                                                                                         |                                           |                    |
| Wildes <sup>43</sup> (2013)   | 4.8% had severe CI (Short Blessed score >9)           | Chemo completion                                     | Median 20 months (0.01-47 months)                                                | n=1 received dose reduction due to renal impairment                                                                                                                                     | N                       | OR 0.71 (0.06-8.46)                                                                                                                                                                                                                                                               | N/A                                       | N/A                |
| <b>Chemotherapy toxicity</b>  |                                                       |                                                      |                                                                                  |                                                                                                                                                                                         |                         |                                                                                                                                                                                                                                                                                   |                                           |                    |
| Aparicio <sup>29</sup> (2013) | 31% had CI (MMSE ≤ 27)                                | Treatment toxicity (at least one grade 3-4 toxicity) | The three outcomes were analyzed during the first 4 months of starting treatment | Randomized to FU-based chemotherapy alone or in combination with IRI. In the IRI arm, first 2 cycles were 150mg/m of IRI, and increased in the absence of toxicity in subsequent cycle. | Y                       | MMSE (≤27) was significant predictive factor in multivariate analysis for grade 3-4 toxicity (OR 3.84; 95% CI: 1.24-11.84)<br><br>In patients with MMSE ≤27/30, 89% (n=17) in the IRI arm had grade 3-4 toxicity versus 50% (n=9) in the FU arm. In patients with an MMSE >27/30, | Y                                         | NR                 |



| Author/year                    | Proportion with and/or Degree of cognitive impairment | Endpoint outcome(s) examined                                                      | Duration of follow-up | Baseline dose reduction (Y/N)                                                                                                                                                             | Found significant (Y/N) | Details                                                                              | Multivariate model performed for CI (Y/N) | Adjusted for in MV                           |
|--------------------------------|-------------------------------------------------------|-----------------------------------------------------------------------------------|-----------------------|-------------------------------------------------------------------------------------------------------------------------------------------------------------------------------------------|-------------------------|--------------------------------------------------------------------------------------|-------------------------------------------|----------------------------------------------|
|                                |                                                       |                                                                                   |                       |                                                                                                                                                                                           |                         |                                                                                      |                                           |                                              |
| Falandry <sup>34</sup> (2013b) | Five words recall<br><br>Mean 18.5 (SD 3.4)           | Chemo toxicity<br><br>Chemo tolerance and efficacy outcomes<br><br>Tumor response | 24 months             | NR                                                                                                                                                                                        | N                       | N/A                                                                                  | N/A                                       | N/A                                          |
| Hamaker <sup>35</sup> (2014)   | 7% had CI (MMSE≤23)                                   | Chemotherapy toxicity                                                             | Median 32 months      | No mention of any baseline dose reduction<br><br>Randomized to doxorubicin 45mg/m q 4 weeks up to 6 weeks, or capecitabine 2000mg/m orally on days 1-14, every 3 weeks for up to 8 cycles | N                       | OR 1.14 (0.09-10.17)                                                                 | N/A                                       | N/A                                          |
| Jayani <sup>3</sup> (2019)     | 36% (250/703) had potential CI (BOMC score 5-10)      | Chemotherapy toxicity                                                             | ?                     | 76% received standard dose (i.e. 24% had dose reduction. However, it is not known how                                                                                                     | Y                       | Potential CI (BOMC score 5-10) was associated with increased risk of severe toxicity | Y                                         | CARG Toxicity Risk Group (low, medium, high) |



| Author/year | Proportion with and/or Degree of cognitive impairment | Endpoint outcome(s) examined | Duration of follow-up | Baseline dose reduction (Y/N) | Found significant (Y/N) | Details                                                                                                                                                                                                                                                                                                                                                                                                                                  | Multivariate model performed for CI (Y/N) | Adjusted for in MV |
|-------------|-------------------------------------------------------|------------------------------|-----------------------|-------------------------------|-------------------------|------------------------------------------------------------------------------------------------------------------------------------------------------------------------------------------------------------------------------------------------------------------------------------------------------------------------------------------------------------------------------------------------------------------------------------------|-------------------------------------------|--------------------|
|             | Patients with dementia were excluded from analysis    |                              |                       | many of whom had CI)          | N                       | <p>(OR 1.54, <math>p \leq 0.01</math>). This was no longer significant after adjusting for CARG score; OR 1.98 (0.76-5.17) However, among patients with lower education level (n=258; 36.7%), potential CI remained associated with severe chemotherapy toxicity despite adjusting for CARG score (OR 1.08; <math>p = 0.03</math>)</p> <p>The incidence of severe chemotherapy toxicity was 51.0% in patients without CI whereas the</p> |                                           |                    |

| Author/year                 | Proportion with and/or Degree of cognitive impairment                                                                                                          | Endpoint outcome(s) examined     | Duration of follow-up             | Baseline dose reduction (Y/N)                       | Found significant (Y/N)         | Details                                                      | Multivariate model performed for CI (Y/N) | Adjusted for in MV |
|-----------------------------|----------------------------------------------------------------------------------------------------------------------------------------------------------------|----------------------------------|-----------------------------------|-----------------------------------------------------|---------------------------------|--------------------------------------------------------------|-------------------------------------------|--------------------|
|                             |                                                                                                                                                                |                                  |                                   |                                                     |                                 | incidence was 61.6% in patients with potential CI.           |                                           |                    |
| Shin <sup>40</sup> (2012)   | Mild cognitive decline (MMSC-KC <=24): 51.6%<br><br>CI (MMSC-KC <16 signifies cognitive impairment) : 4.7%<br><br>Patients with 'significant' CI were excluded | Chemo toxicity                   | Mean 8.89 weeks                   | NR                                                  | N                               | Mild CI: OR 0.68 (0.18-2.63)<br><br>CI: OR 1.53 (1.12-19.88) | N/A                                       | N/A                |
| Wildes <sup>43</sup> (2013) | 4.8% had severe CI(                                                                                                                                            | Chemo toxicity (non-hematologic) | Median 20 months (0.01-47 months) | n=1 received dose reduction due to renal impairment | Not estimable due to 0 count of | N/A                                                          | N/A                                       | N/A                |

| Author/year | Proportion with and/or Degree of cognitive impairment | Endpoint outcome(s) examined | Duration of follow-up | Baseline dose reduction (Y/N) | Found significant (Y/N) | Details | Multivariate model performed for CI (Y/N) | Adjusted for in MV |
|-------------|-------------------------------------------------------|------------------------------|-----------------------|-------------------------------|-------------------------|---------|-------------------------------------------|--------------------|
|             | Short Blessed score >9)                               |                              |                       |                               | toxicity in the cell    |         |                                           |                    |

<sup>b</sup>Abe et al. referred to mild and moderate CI as 'dementia' in this study.

\*\*modified mini mental status exam

^^ adjusting for age, gender, hemoglobin, ECOG score, prior myelodysplastic syndrome, and cytogenetic group

BOMC = Blessed Orientation-Memory-Concentration test

BPSD = Behavioural and psychological symptoms of dementia

CARG = Cancer and Aging Research Group
