# Supplementary material for: The Impact of Cognitive Impairment on Treatment Toxicity, Treatment Completion, and Survival among Older Adults Receiving Chemotherapy: A Systematic Review
Source: MDPI journal article supplement (doi:10.3390/cancers14061582), 2022-03-21
Supplement: s1 [file s1]

**Supplementary S2. Risk of Bias Assessment\***

| <b>Author</b>                         | <b>Study participation</b> | <b>Study attrition</b> | <b>Prognostic factor measurement</b> | <b>Outcome measurement</b> | <b>Study confounding</b> | <b>Statistical analyzing and reporting</b> |
|---------------------------------------|----------------------------|------------------------|--------------------------------------|----------------------------|--------------------------|--------------------------------------------|
| <b>Abe (2011)</b> <sup>24</sup>       | Moderate                   | Low                    | Moderate                             | Low                        | Moderate                 | Low                                        |
| <b>Aaldriks (2011)</b> <sup>25</sup>  | Low                        | Low                    | Low                                  | Low                        | Low                      | Low                                        |
| <b>Aaldriks (2013a)</b> <sup>26</sup> | Low                        | Low                    | Low                                  | Low                        | Low                      | Low                                        |
| <b>Aaldriks (2013b)</b> <sup>27</sup> | Low                        | Low                    | Low                                  | Low                        | Low                      | Low                                        |
| <b>Aaldriks (2016)</b> <sup>28</sup>  | Low                        | Not applicable         | Low                                  | Low                        | Low                      | Low                                        |
| <b>Aparicio (2013)</b> <sup>29</sup>  | Low                        | Not applicable         | Moderate                             | Low                        | Low                      | Low                                        |
| <b>Biesma (2011)</b> <sup>30</sup>    | Moderate                   | Low                    | Low                                  | Moderate                   | Low                      | Low                                        |
| <b>Dubruille (2015)</b> <sup>31</sup> | Low                        | Low                    | Low                                  | Low                        | Low                      | Low                                        |
| <b>Extermann (2012)</b> <sup>32</sup> | Low                        | Moderate               | Low                                  | Low                        | Low                      | Low                                        |
| <b>Falandry (2013a)</b> <sup>33</sup> | Low                        | Low                    | Low                                  | Moderate                   | Low                      | Moderate                                   |
| <b>Falandry (2013b)</b> <sup>34</sup> | Low                        | Low                    | Low                                  | Moderate                   | Low                      | Moderate                                   |
| <b>Hamaker (2014)</b> <sup>35</sup>   | Low                        | Moderate               | Low                                  | Low                        | Low                      | Low                                        |
| <b>Hshieh (2018)</b> <sup>3</sup>     | Moderate                   | Low                    | Low                                  | Low                        | Low                      | Low                                        |
| <b>Jayani (2019)</b> <sup>12</sup>    | Low                        | Low                    | Low                                  | Low                        | Low                      | Low                                        |
| <b>Klepin (2013)</b> <sup>36</sup>    | Low                        | Low                    | Low                                  | Low                        | Low                      | Low                                        |
| <b>Laurent (2014)</b> <sup>37</sup>   | Low                        | Moderate               | Moderate                             | Low                        | Not applicable           | Low                                        |
| <b>Lee (2020)</b> <sup>44</sup>       | Low                        | Low                    | Moderate                             | Low                        | Not applicable           | Low                                        |
| <b>Molga (2019)</b> <sup>38</sup>     | Low                        | Low                    | Low                                  | Low                        | Low                      | Low                                        |
| <b>Robb (2009)</b> <sup>49</sup>      | Low                        | Low                    | Low                                  | Low                        | Low                      | Low                                        |
| <b>Shin (2012)</b> <sup>40</sup>      | Low                        | Moderate               | Low                                  | Low                        | Low                      | Low                                        |
| <b>Soubeyran (2012)</b> <sup>41</sup> | Low                        | Moderate               | Low                                  | Low                        | Low                      | Low                                        |
| <b>Thibaud (2021)</b> <sup>42</sup>   | Low                        | Low                    | Moderate                             | Low                        | Moderate                 | Low                                        |
| <b>Wildes (2013)</b> <sup>43</sup>    | Low                        | Low                    | Low                                  | Low                        | Low                      | Low                                        |

\*Based on the Quality Assessment in Prognostic Studies (QUIPS) tool
